# Supplementary material for: MALDI-TOF MS-based total serum protein fingerprinting for liver cancer diagnosis
Source: Royal Society of Chemistry journal article supplement (doi:10.1039/c8an02241k), 2019-01-01
Supplement: c8an02241k1.pdf [file c8an02241k1.pdf]

## Supplementary Information

### **MALDI-TOF MS-based total serum protein fingerprinting for liver cancer diagnosis**

Han-Gyu Park<sup>1,+</sup>, Kyoung-Soon Jang<sup>2,+</sup>, Hae-Min Park<sup>3</sup>, Won-Suk Song<sup>4</sup>, Yoon-Yi  
Jeong<sup>1</sup>, Da-Hee Ahn<sup>1</sup>, Seong-Min Kim<sup>1</sup>, Yung-Hun Yang<sup>5</sup> and Yun-Gon Kim<sup>\*,1</sup>

<sup>1</sup>Department of Chemical Engineering, Soongsil University, Seoul 06978, Korea

<sup>2</sup>Biomedical Omics Center, Korea Basic Science Institute, Cheongju 28119, Korea

<sup>3</sup>Departments of Chemistry and Molecular Biosciences, Northwestern University,  
Evanston, Illinois 60208, United States

<sup>4</sup>School of Chemical and Biological Engineering, Seoul National University, Seoul 08826,  
Korea

<sup>5</sup>Department of Biological Engineering, Konkuk University, Seoul 05029, Korea

\*Corresponding author contact information:

Yun-Gon Kim, Prof.

Department of Chemical Engineering, Soongsil University

369 Sangdo-Ro, Seoul, Korea

E-mail: ygkim@ssu.ac.kr

Phone: +82-2-828-7099

<sup>+</sup>These authors contributed equally to this work

**Table S1.** Information of serum from patients with liver cancer used our MALDI-TOF MS-based serum protein fingerprinting platform for liver cancer diagnosis

|    | MSP /<br>RTC           | UICC<br>stage | TNM<br>Classification | Hepatitis<br>type | Gender | Age | Pathology report                                                                                                         |
|----|------------------------|---------------|-----------------------|-------------------|--------|-----|--------------------------------------------------------------------------------------------------------------------------|
| 1  | Liver<br>cancer<br>MSP | Stage I       | T1N0M0                | C                 | M      | 55  | HCC, trabecular type background of chronic hepatitis, HCV related grade1 and stage1                                      |
| 2  |                        | Stage I       | T1N0M0                | C                 | M      | 66  | HCC, NOS                                                                                                                 |
| 3  |                        | Stage I       | T1N0M0                | C                 | M      | 68  | HCC, trabecular type background of chronic hepatitis, HBV related grade 1 and stage 0                                    |
| 4  |                        | Stage I       | T1N0M0                | C                 | M      | 72  | Liver cell carcinoma                                                                                                     |
| 5  |                        | Stage I       | T1N0M0                | C                 | M      | 81  | HCC, trabecular type background of fatty liver                                                                           |
| 6  |                        | Stage I       | T1N0M0                | C                 | M      | 77  | HCC, trabecular type. background of macro and microvesicular steatosis                                                   |
| 7  |                        | Stage I       | T1N0M0                | C                 | M      | 47  | Not available                                                                                                            |
| 8  |                        | Stage I       | T1N0M0                | B                 | M      | 65  | Not available                                                                                                            |
| 9  |                        | Stage I       | T1N0M0                | B                 | M      | 66  | Not available                                                                                                            |
| 10 |                        | Stage I       | T1N0M0                | B                 | M      | 60  | Not available                                                                                                            |
| 11 |                        | Stage I       | T1N0M0                | B                 | M      | 48  | Not available                                                                                                            |
| 12 |                        | Stage II      | T2N0M0                | C                 | F      | 80  | HCC, trabecular type. background of cirrhosis                                                                            |
| 13 |                        | Stage II      | T2N0M0                | B                 | M      | 32  | Not available                                                                                                            |
| 14 |                        | Stage II      | T2N0M0                | B                 | M      | 57  | Not available                                                                                                            |
| 15 |                        | Stage II      | T2N0M0                | B                 | M      | 77  | Not available                                                                                                            |
| 16 |                        | Stage III     | T3N0M0                | C                 | M      | 64  | HCC, trabecular type, background of macro and micronodular cirrhosis, unknown etiology                                   |
| 17 |                        | Stage III     | T3N0M0                | C                 | M      | 70  | HCC, trabecular type with clear resection margin                                                                         |
| 18 |                        | Stage III     | T3N0M0                | C                 | M      | 46  | HCC, trabecular type, angiolymphatic invasion identified. (portal vein invasion) background of macro and micro steatosis |
| 19 |                        | Stage IV      | T2NXM1                | C                 | M      | 60  | adenocarcinoma, NOS                                                                                                      |

|    |            |          |        |   |   |    |                                                                                                    |
|----|------------|----------|--------|---|---|----|----------------------------------------------------------------------------------------------------|
| 20 |            | Stage IV | T2NXM1 | C | F | 68 | HCC, lung metastasis                                                                               |
| 21 |            | Stage IV | T4NXM1 | B | M | 59 | Not available                                                                                      |
| 22 |            | Unknown  | T2NXM0 | C | M | 29 | HCC, trabecular type background of cirrhosis                                                       |
| 23 |            | Unknown  | T3NXM0 | C | M | 55 | Not available                                                                                      |
| 24 |            | Unknown  | T2NXM0 | C | F | 58 | HCC, Edmondson's grade 2                                                                           |
| 25 |            | Unknown  | T2NXM0 | C | M | 59 | Not available                                                                                      |
| 26 |            | Unknown  | T3NXM0 | C | M | 63 | HCC, trabecular type                                                                               |
| 27 |            | Unknown  | T1NXM0 | C | M | 67 | Not available                                                                                      |
| 28 |            | Unknown  | T2NXM0 | C | M | 55 | Not available                                                                                      |
| 29 |            | Unknown  | T1NXM0 | C | M | 59 | Not available                                                                                      |
| 30 |            | Unknown  | T3NXM0 | B | M | 68 | Not available                                                                                      |
| 31 |            | Unknown  | T3NXM0 | B | F | 43 | Not available                                                                                      |
| 32 |            | Unknown  | T3NXM0 | B | M | 70 | Not available                                                                                      |
| 33 |            | Unknown  | T3NXM0 | B | M | 62 | Not available                                                                                      |
| 34 |            | Unknown  | T2NXM0 | B | M | 59 | Not available                                                                                      |
| 35 |            | Unknown  |        | C | F | 65 | HCC, bile duct invasion                                                                            |
| 36 |            |          |        | C | M | 57 | Cholangiocarcinoma, forming(MF) type                                                               |
| 37 |            |          |        | C | F | 58 | HCC, trabecular type. background of liver cirrhosis                                                |
| 38 |            |          |        | C | M | 35 | High grade dysplastic nodule, background of HBV-associated liver cirrhosis                         |
| 39 |            |          |        | C | M | 61 | HCC, trabecular and psedoglandular type, background of macro and microvesicular steatosis          |
| 40 |            |          |        | C | M | 80 | HCC, trabecular and psedoglandular type, background of chronic hepatitis, with periportal fibrosis |
| 41 | Blind test | Stage I  | T1N0M0 | C | M | 74 | Liver cell carcinoma, liver cirrhosis                                                              |
| 42 |            | Stage I  | T1N0M0 | C | F | 71 | Not available                                                                                      |

|    |   |           |        |   |    |                                       |                                                                     |
|----|---|-----------|--------|---|----|---------------------------------------|---------------------------------------------------------------------|
| 43 |   | Stage I   | T1N0M0 | B | M  | 65                                    | Not available                                                       |
| 44 |   | Stage II  | T2N0M0 | C | M  | 81                                    | Not available                                                       |
| 45 |   | Stage III | T3N0M0 | B | F  | 71                                    | Not available                                                       |
| 46 |   | Stage IV  | T1NXM1 | C | M  | 74                                    | Adenocarcinoma, poorly differentiated, possibly metastatic          |
| 47 |   | Stage IV  | T4NXM1 | B | F  | 71                                    | Not available                                                       |
| 48 |   | Unknown   | T1NXM0 | C | M  | 75                                    | Not available                                                       |
| 49 |   | Unknown   | T3NXM0 | B | F  | 69                                    | Not available                                                       |
| 50 |   | Unknown   | T2NXM0 | B | M  | 76                                    | Not available                                                       |
| 51 |   | Unknown   | T3NXM0 | B | M  | 51                                    | Not available                                                       |
| 52 |   | Unknown   |        | C | M  | 65                                    | HCC, pseudoglandular type background of cirrhosis alcoholic related |
| 53 | C |           |        | F | 55 | HNF 1a-mutated hepatocellular adenoma |                                                                     |

**Table S2.** The score obtained by comparing integrated MSPs with healthy controls serum (n=18) of blind test set for validation

| Name               | Healthy control MSP | Liver cancer MSP |
|--------------------|---------------------|------------------|
| Healthy control 1  | 2.595±0.099         | 1.736±0.130      |
| Healthy control 2  | 2.399±0.078         | 1.702±0.105      |
| Healthy control 3  | 2.390±0.019         | 1.797±0.048      |
| Healthy control 4  | 2.456±0.056         | 1.834±0.170      |
| Healthy control 5  | 2.427±0.050         | 1.934±0.011      |
| Healthy control 6  | 2.608±0.026         | 1.885±0.039      |
| Healthy control 7  | 2.573±0.026         | 1.703±0.095      |
| Healthy control 8  | 2.507±0.044         | 0.913±0.108      |
| Healthy control 9  | 2.640±0.073         | 1.810±0.052      |
| Healthy control 10 | 2.608±0.045         | 1.682±0.085      |
| Healthy control 11 | 2.639±0.063         | 1.598±0.059      |
| Healthy control 12 | 2.639±0.047         | 1.514±0.021      |
| Healthy control 13 | 2.249±0.054         | 0.919±0.135      |
| Healthy control 14 | 2.675±0.029         | 1.608±0.045      |
| Healthy control 15 | 2.611±0.023         | 1.671±0.121      |
| Healthy control 16 | 2.701±0.082         | 1.646±0.185      |
| Healthy control 17 | 2.772±0.015         | 1.796±0.033      |
| Healthy control 18 | 2.626±0.074         | 1.393±0.012      |

**Suppl Table S3.** The score obtained by comparing integrated MSPs with liver cancer serum (n=13) of blind test set for validation

| Name            | Healthy control MSP | Liver cancer MSP | Hepatitis type | UICC stage |
|-----------------|---------------------|------------------|----------------|------------|
| Liver cancer 1  | 1.401±0.035         | 2.363±0.057      | C              | I          |
| Liver cancer 2  | 1.557±0.162         | 2.409±0.078      | C              | IV         |
| Liver cancer 3  | 1.115±0.011         | 2.268±0.043      | C              | II         |
| Liver cancer 4  | 1.733±0.037         | 2.347±0.016      | B              | III        |
| Liver cancer 5  | 1.528±0.111         | 2.433±0.057      | B              | IV         |
| Liver cancer 6  | 1.470±0.079         | 2.181±0.068      | B              | I          |
| Liver cancer 7  | 1.202±0.023         | 2.045±0.040      | C              | I          |
| Liver cancer 8  | 1.288±0.029         | 2.120±0.020      | C              | Unknown    |
| Liver cancer 9  | 1.633±0.046         | 2.446±0.038      | C              | Unknown    |
| Liver cancer 10 | 1.126±0.069         | 2.171±0.013      | B              | Unknown    |
| Liver cancer 11 | 1.410±0.078         | 2.198±0.026      | C              | Unknown    |
| Liver cancer 12 | 1.489±0.089         | 2.342±0.057      | B              | Unknown    |
| Liver cancer 13 | 0.999±0.053         | 2.205±0.041      | B              | Unknown    |

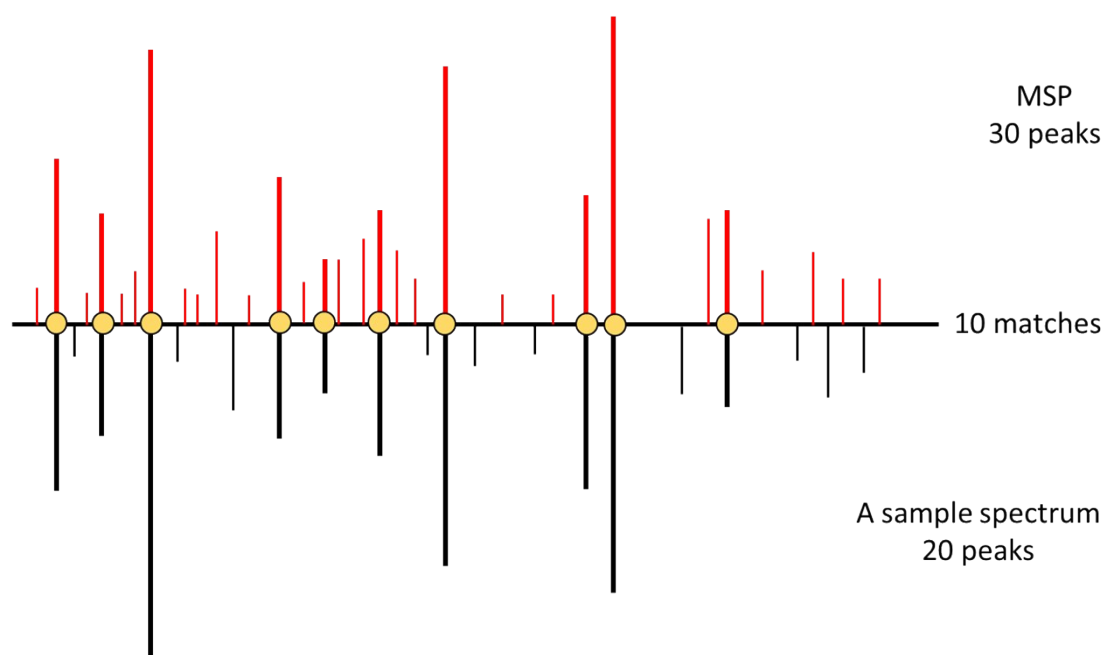

**Three factors for score value**

- The number of matched peaks/the number of a sample spectrum peaks (10/20)
- The number of matched peaks/the number of MSP peaks (10/30)
- Comparison of intensity of matched peaks

**Figure S1.** Example of three factors considered in computation of score value

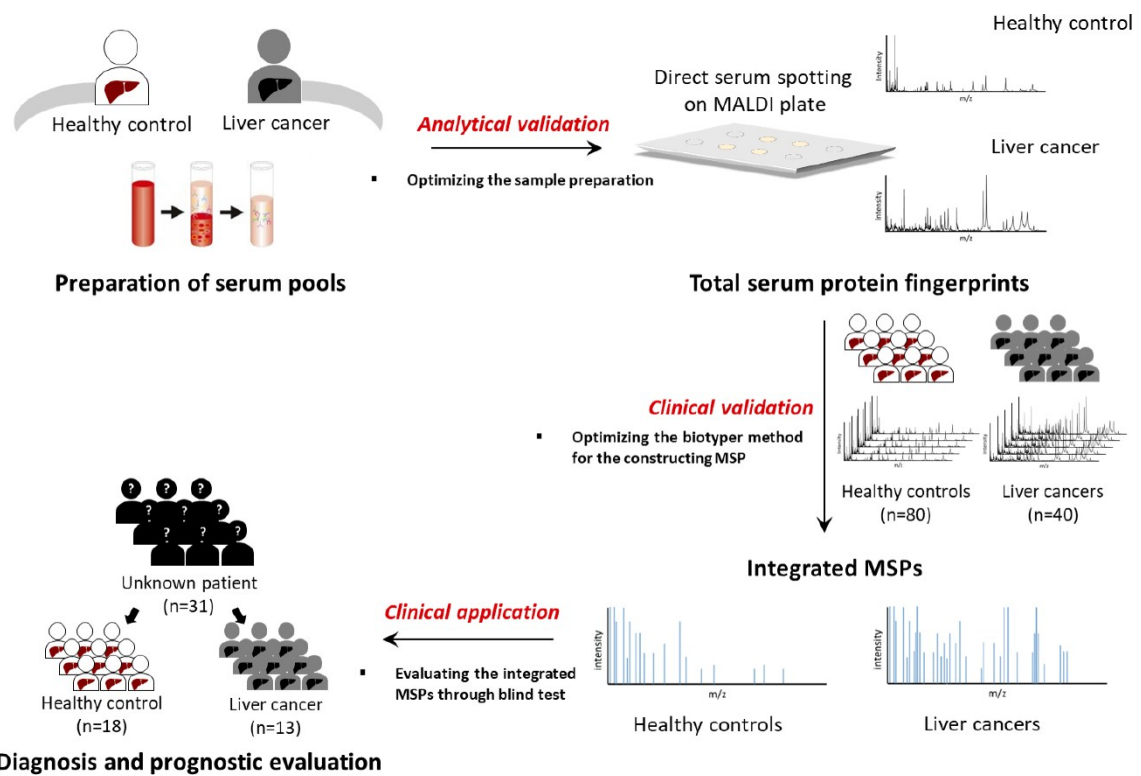

**Figure S2.** Overall workflow of the liver cancer diagnostic method *via* MALDI-based total serum fingerprinting



### Healthy control

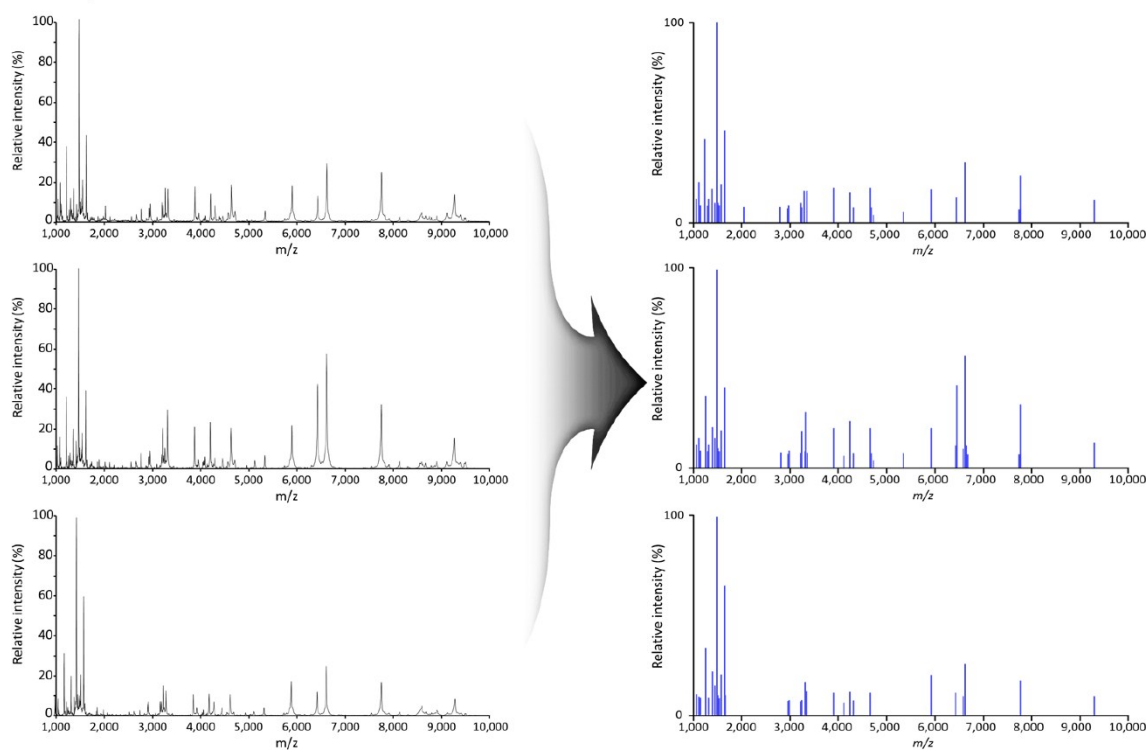

**Figure S3.** One of five healthy control serum samples that were repeated analyzed three times. The results show no significant differences among repeatedly analyzed MS spectra

### Liver cancer

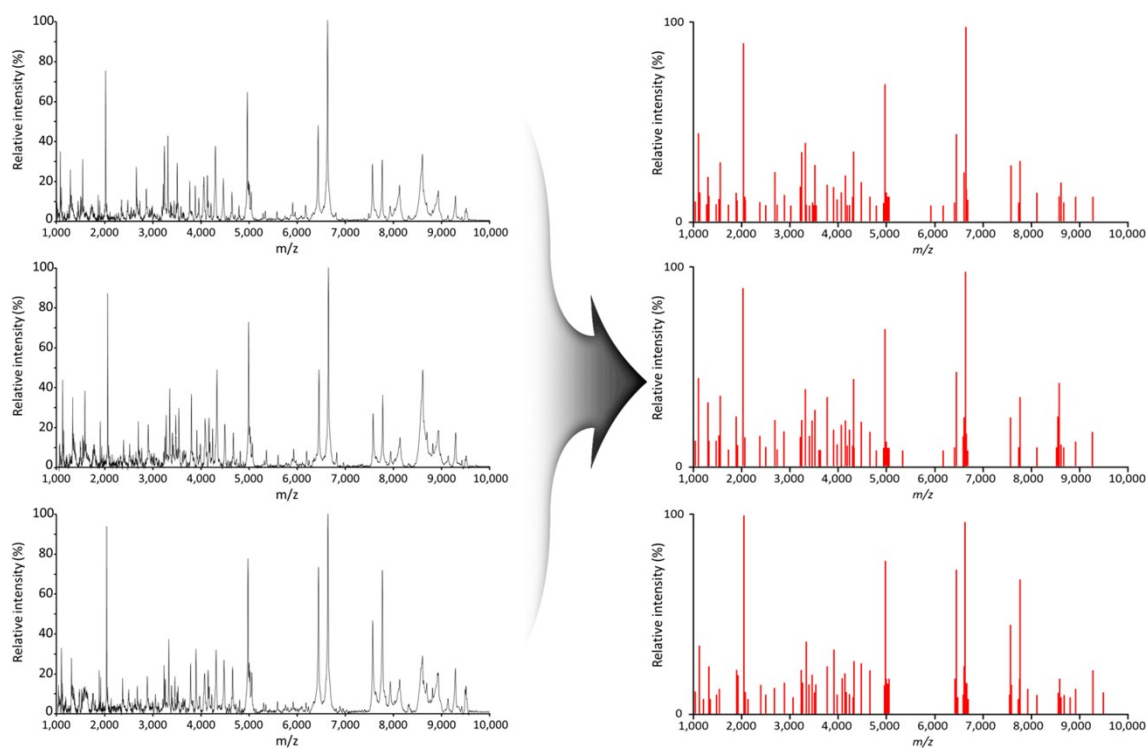

**Figure S4.** One of five liver cancer serum samples that were repeated analyzed three times. The results show no significant differences among repeatedly analyzed MS spectra

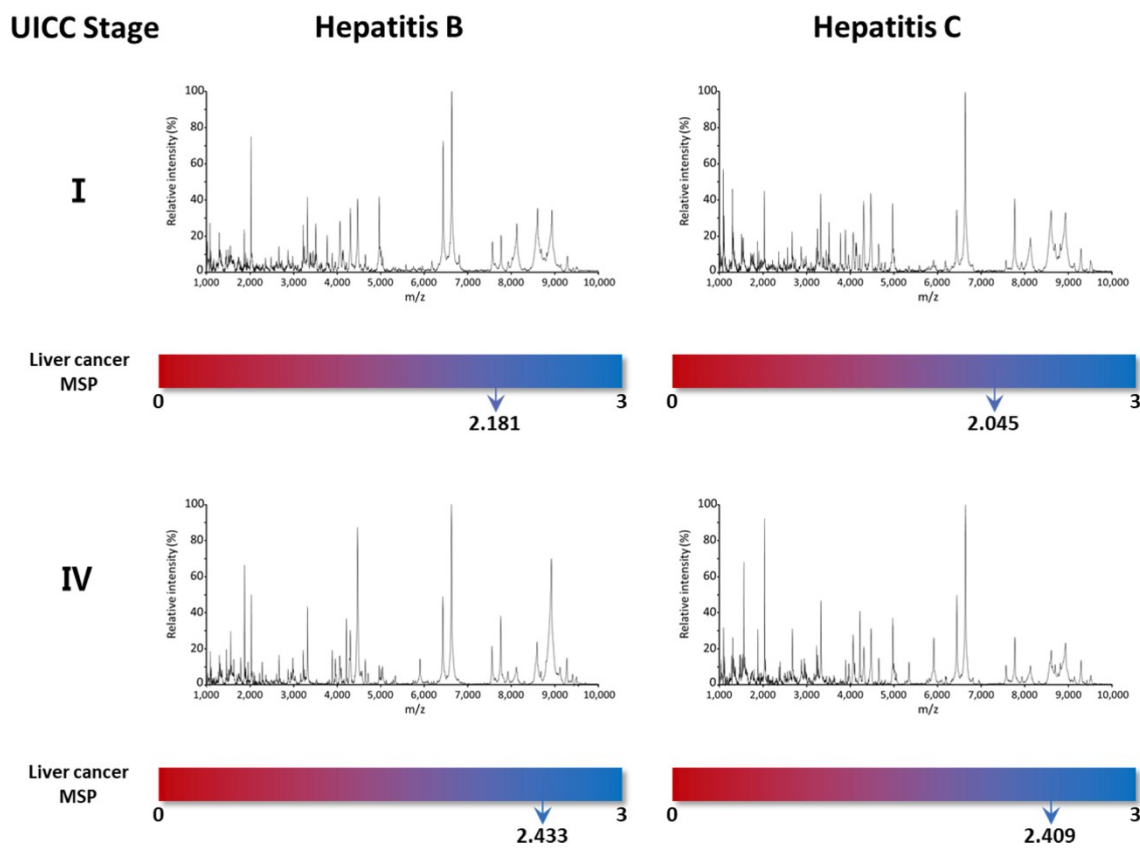

**Figure S5.** Comparison of MALDI-MS spectrum and score according to cancer stage.
